# Supplementary material for: A cyclam-type “turn on” fluorescent sensor selective for mercury ions in aqueous media
Source: Royal Society of Chemistry journal article supplement (doi:10.1039/c2ra20971c), 2012-01-01
Supplement: c2ra20971c.pdf [file c2ra20971c.pdf]

## A cyclam-type “turn on” fluorescent sensor selective for mercury ions in aqueous media

Styliani Voutsadaki, George K. Tsikalas, Emmanuel Klontzas, George E. Froudakis, Spiros A. Pergantis, Konstantinos D. Demadis, and Haralambos E. Katerinopoulos\*

E-mail: [kater@chemistry.uoc.gr](mailto:kater@chemistry.uoc.gr)

### Supporting Information Available:

- I) Experimental section
- II) Spectral Data ( $^1\text{H}$  NMR,  $^{13}\text{C}$  NMR, DART-TOF-Mass spectra, and ESI-Mass spectra and HRMS)
- III) Fluorescence Spectra for **3** in the free and  $\text{Hg}^{2+}$ -bound form
- IV) Fluorescence enhancement of probe **5** in the presence of ions.
- V) DFT geometry optimization for the **5**-  $\text{Hg}^{2+}$  and **3**- $\text{Hg}^{2+}$  complexes
- VI) Detection limit of probe **3** for  $\text{Hg}^{2+}$  ions.

### I) Experimental Section

**General Procedures:** All reactions were carried out under anhydrous conditions in dry solvents, using argon or nitrogen in flame-dried glassware. Reactions were monitored by thin-layer chromatography (TLC) using silica gel plates from Merck (60F254), which were visualized under a UV-Vis Lamp (254 and 366 nm, respectively) or with a 7% ethanolic solution of phosphomolybdic acid. Flash column chromatography was performed in silica gel 60 from Merck (230-400 mesh). NMR spectra were taken on an AMX500 Bruker FT-NMR or a MSL300 Bruker FT-NMR spectrometer; proton chemical shifts are reported in relative to tetramethylsilane. Fluorescence spectra were recorded on an Aminco Bowman spectrofluorimeter (Spectronics Co., USA). Mass spectrometric experiments were performed using DART-TOF-MS (JEOL: JMS T100TD) technique<sup>1</sup> and ESI-Mass spectrometer. HRMS were taken at ProFI, Foundation for Research and Technology-Hellas (ITE), Heraklion, Greece. Ultra-pure water was collected from a PURELAB Ultra instrument by ELGA.

**Tri-BOC-cyclam 2:** To a solution of cyclam **1** (200 mg, 0.998 mmol) in 14 ml CHCl<sub>3</sub>, was added dropwise – within 0.5 h - a solution of (BOC)<sub>2</sub>O (653 mg, 2.994 mmol) in 20 ml CHCl<sub>3</sub>, at -40 °C. After the completion of the reaction, as indicated by TLC (50% ethyl acetate in petroleum ether), the solvent was distilled in high vacuum and product **2** was isolated through flash liquid gradient chromatography, using initially 50% ethyl acetate in petroleum ether, then 100% ethyl acetate and sequentially 5% and 10% ethyl acetate in methanol as solvents. The product was white-coloured with foamy texture. Chromatography yielded 435 mg of tri-BOC-cyclam **2** (87 %). <sup>1</sup>H NMR (500 MHz, CDCl<sub>3</sub>): δ 3.26-3.37 (m, 12H), 2.78 (m, 2H), 2.61 (m, 2H), 1.88 (m, 2H), 1.69 (m, 2H), 1.41 (bs, 27H); <sup>13</sup>C NMR (300 MHz, CDCl<sub>3</sub> / 1 drop CD<sub>3</sub>OD): 160.38, 159.67, 83.90, 83.73, 53.59, 51.56, 50.47, 49.49, 48.42, 33.51, 32.25. HRMS: calculated for C<sub>25</sub>H<sub>49</sub>N<sub>4</sub>O<sub>6</sub>: 501.3652, found 501.3658.

**7-Isothiocyanto-4-methyl-2H-1-benzopyran-2-one, (1):** To a solution of 7-amino-4-methylcoumarin (Aldrich) (245 mg, 1.4 mmol), in 14 ml CH<sub>2</sub>Cl<sub>2</sub> was added triethylamine (390 µl, 2.8 mmol) and the solution was stirred at 35° C for 10.0 min. After cooling the system to room temperature, thiophosgene (320 µl, 4.2 mmol) was added dropwise and the mixture was stirred at 35° C for 20.0 min. The reaction was completed after 20.0 min, as indicated by TLC (20% acetone in toluene). Excess of CSCI<sub>2</sub> was removed by distillation in high vacuum. The orange precipitate was dissolved in 10 ml CH<sub>2</sub>Cl<sub>2</sub>, filtered through silica gel for the removal of triethylamine hydrochloride, washed with 3 ml dichloromethane, and dried in high vacuum to yield 301 mg (98%) of **1** as a light orange solid. <sup>1</sup>H NMR (500 MHz, CDCl<sub>3</sub>): δ 7.54 (d, *J*=5.5 Hz, 1H), 7.23 (s, 1H), 7.11 (d, *J*=5 Hz, 1H), 7.08 (s, 1H), 2.40 (s, 3H); <sup>13</sup>C NMR (500 MHz, CDCl<sub>3</sub>): 160.32, 154.43, 151.98, 139.09, 134.87, 126.36, 122.43, 119.39, 115.65, 114.18, 19.27. HRMS: calculated for C<sub>11</sub>H<sub>6</sub>NO<sub>2</sub>S: 218.0275, found 218.0272.

**Tri-BOC-cyclam coumarin probe 3:** (1,4,8,11-tetraazacyclotetradecane-1,4,8-tricarboxylic acid,11-[[[(4-methyl-2-oxo-2H-1-benzopyran-7-yl)amino] carbonothioyl]-tris(1,1-dimethylethyl) ester: To a solution of isothiocyanate **1** (62 mg, 0.286 mmol) in 5 ml CHCl<sub>3</sub> was added tri-BOC-cyclam **2** (143 mg, 0.286 mmol) and the solution was heated at 50 °C for 30.0 min. After the completion of the reaction, as indicated by TLC (20% acetone in toluene), solvent was distilled in high vacuum and the isolation

of probe **3** was achieved through flash liquid step elution chromatography, using 20, 30, 50%, 100% ethyl acetate in toluene as solvents. Chromatography yielded 199 mg probe **3** (97 %). TLC:  $R_f$ : 0.61 (EtOAc/Toluene/MeOH: 49/49/2).  $^1\text{H}$  NMR (500 MHz, DMSO- $d_6$ ):  $\delta$  9.10 (br.s, 1H, thioamide), 7.70 (d,  $J=9.0$  Hz, 1H, C<sub>5</sub>-H), 7.39 (overlapping s & d,  $J=9.0$  Hz, 2H, C<sub>8</sub>-H & C<sub>6</sub>-H), 6.32 (s, 1H, C<sub>3</sub>-H), 3.91 (br.s., 2H, - (CO)N-CH<sub>2</sub>CH<sub>2</sub>CH<sub>2</sub>-N(CO)), 3.77 (br.s., 2H, (CO)N-CH<sub>2</sub>CH<sub>2</sub>CH<sub>2</sub>-N(CO)), 3.60 (br.s., 2H, (C=S)N-CH<sub>2</sub>CH<sub>2</sub>CH<sub>2</sub>-N(CO)), 3.42-3.25 (m, 10H, (CO)N-CH<sub>2</sub>CH<sub>2</sub>-N(CO)), 3.30-3.21 & (C=S)N-CH<sub>2</sub>CH<sub>2</sub>CH<sub>2</sub>-N(CO)), 2.43 (s, 3H, aryl methyl), 1.88 (m, 2H, CH<sub>2</sub>CH<sub>2</sub>CH<sub>2</sub>-), 1.67 (m, 2H, -CH<sub>2</sub>CH<sub>2</sub>CH<sub>2</sub>-), 1.37 (s, 27H, C(CH<sub>3</sub>)<sub>3</sub>);  $^{13}\text{C}$  NMR (300 MHz, CDCl<sub>3</sub>): 180.90 (C=S), 161.20 (C=O, coumarin), 156.00 (C-8a), 155.75 (C-4), 155.53, 153.67, 152.44 (BOC, C=O), 143.65 (C-7, coumarin), 124.05 (C-5), 121.06 (C-6), 116.65 (C-4a), 113.63 (C-3), 111.97 (C-8), 80.10 [O-C(CH<sub>3</sub>)<sub>3</sub>], 50.46 (-CH<sub>2</sub>-N-S=O), 48.39, 46.49 (-CH<sub>2</sub>CH<sub>2</sub>CH<sub>2</sub>-N-C=O), 47.75 (N-CH<sub>2</sub>CH<sub>2</sub>-N), 28.38 [-C(CH<sub>3</sub>)<sub>3</sub>], 27.63 (-CH<sub>2</sub>CH<sub>2</sub>CH<sub>2</sub>-N-C=O), 18.63 (vinyl methyl). ESI- MS:  $m/z$  740 (M+Na)<sup>+</sup>, 756 (M+K)<sup>+</sup>. HRMS calcd for C<sub>36</sub>H<sub>55</sub>N<sub>5</sub>O<sub>8</sub>S+H, 718.3844; found: 718.3846.

**Cyclam coumarin probe 5:** (*N*-(4-methyl-2-oxo-2*H*-1-benzopyran-7-yl)-1,4,8,11-tetraazacyclotetradecane-1-carbothioamide).

To a solution of cyclam (184,0 mg, 0.92 mmol) in 25 ml CHCl<sub>3</sub> cooled at -50 °C was added isothiocyanate **1** (100,0 mg, 0.46 mmol) dissolved in 5 ml CHCl<sub>3</sub> dropwise in a 1h period. The solution was then allowed to reach room temperature and was further stirred for 0.5h. After the completion of the reaction, as indicated by TLC (20% acetone in toluene), the solvent was distilled *in vacuo* and the isolation of probe **5** was achieved through repeated suspensions of the reaction mixture in ethanol followed by centrifugation. It must be noticed at this point that, when methanol was used as solvent, the purity of the resulting solid product was very low. This procedure yielded 134 mg of probe **5** (70.0 %). TLC:  $R_f$ : 0.61 (0,1% CH<sub>2</sub>Cl<sub>2</sub> in MeOH).  $^1\text{H}$  NMR (300 MHz, DMSO- $d_6$ ):  $\delta$  7.65 (d,  $J=8.5$  Hz, 1H, H-5), 7.47 (s, 1H, H-8), 7.41 (d,  $J=8.5$  Hz 1H, H-6), 6.23 (s, 1H, H-3), 3.54 (br.s., 3H, N-H), 3.79 (m, 2H, (C=S)-N-CH<sub>2</sub>-), 3.34 (br.s., 12H, -CH<sub>2</sub>CH<sub>2</sub>CH<sub>2</sub>- & -C(=S)-N-CH<sub>2</sub>CH<sub>2</sub>-N) & -NH-CH<sub>2</sub>CH<sub>2</sub>-NH), 2.93, (br.s., 2H, -NH-CH<sub>2</sub>CH<sub>2</sub>-NH) 2.71 (br.s., 2H, -CH<sub>2</sub>CH<sub>2</sub>CH<sub>2</sub>-), 2.41 (s, 3H, CH<sub>3</sub>) 1.94 (br.s., 2H, -CH<sub>2</sub>CH<sub>2</sub>CH<sub>2</sub>-). ESI- MS (negative ionization):  $m/z$  416 (M-H)<sup>-</sup>. HRMS (positive mode) calcd for C<sub>21</sub>H<sub>31</sub>N<sub>5</sub>O<sub>2</sub>S+H, 418.2271; found: 418.2271.

## II) Spectral Data for Compounds 1, 2, 3 and 5.

### <sup>1</sup>H NMR spectrum of compound 2 (500 MHz, CDCl<sub>3</sub>)

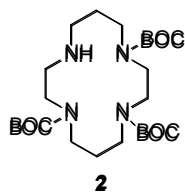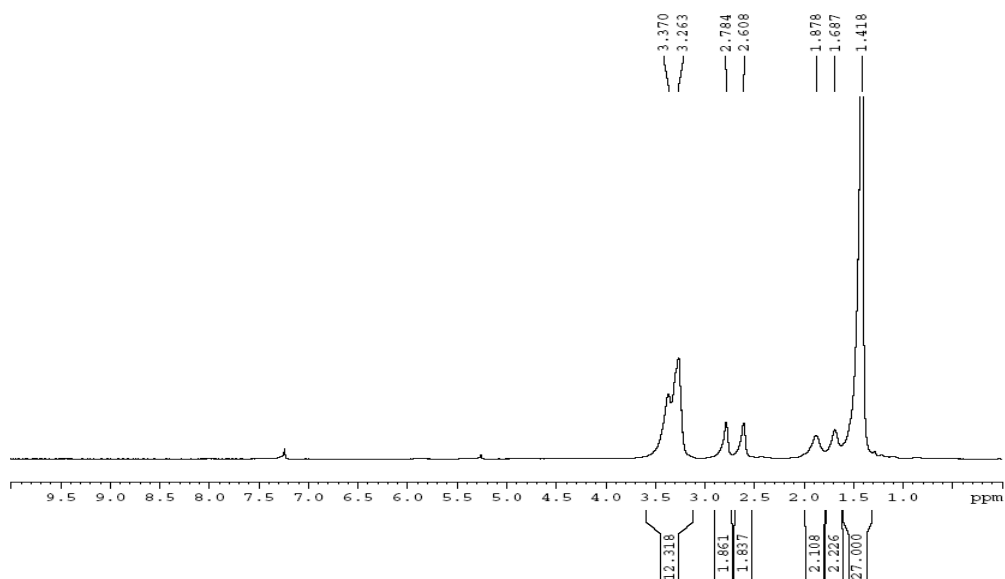

### <sup>13</sup>C NMR spectrum of compound 2 (300 MHz, CDCl<sub>3</sub> / 1 drop CD<sub>3</sub>OD)

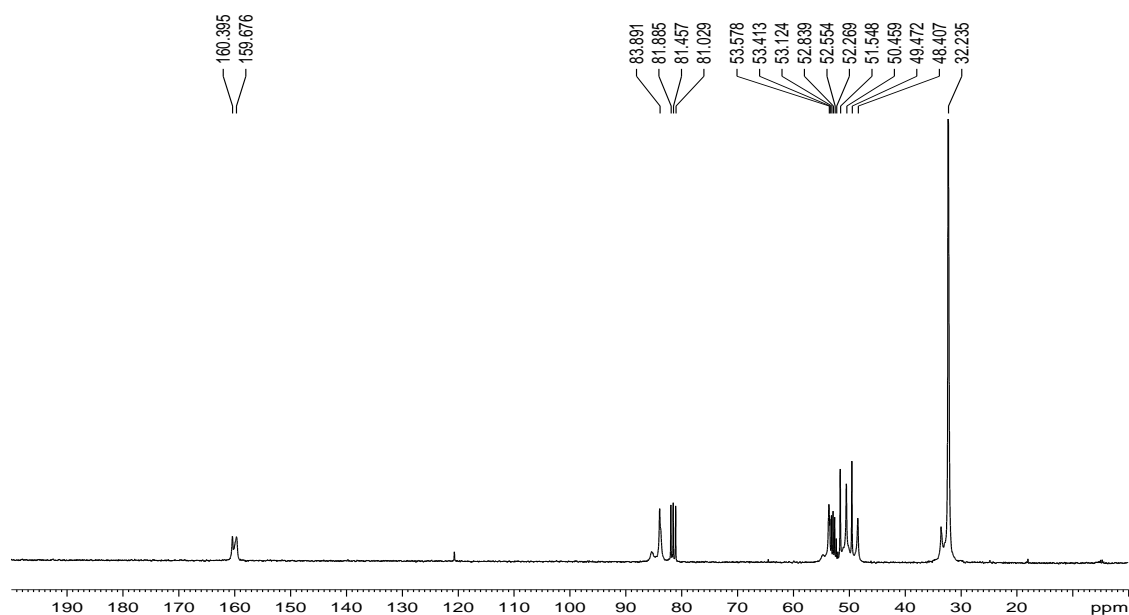

**<sup>1</sup>H NMR spectrum of compound 1 (500 MHz, CDCl<sub>3</sub>)**

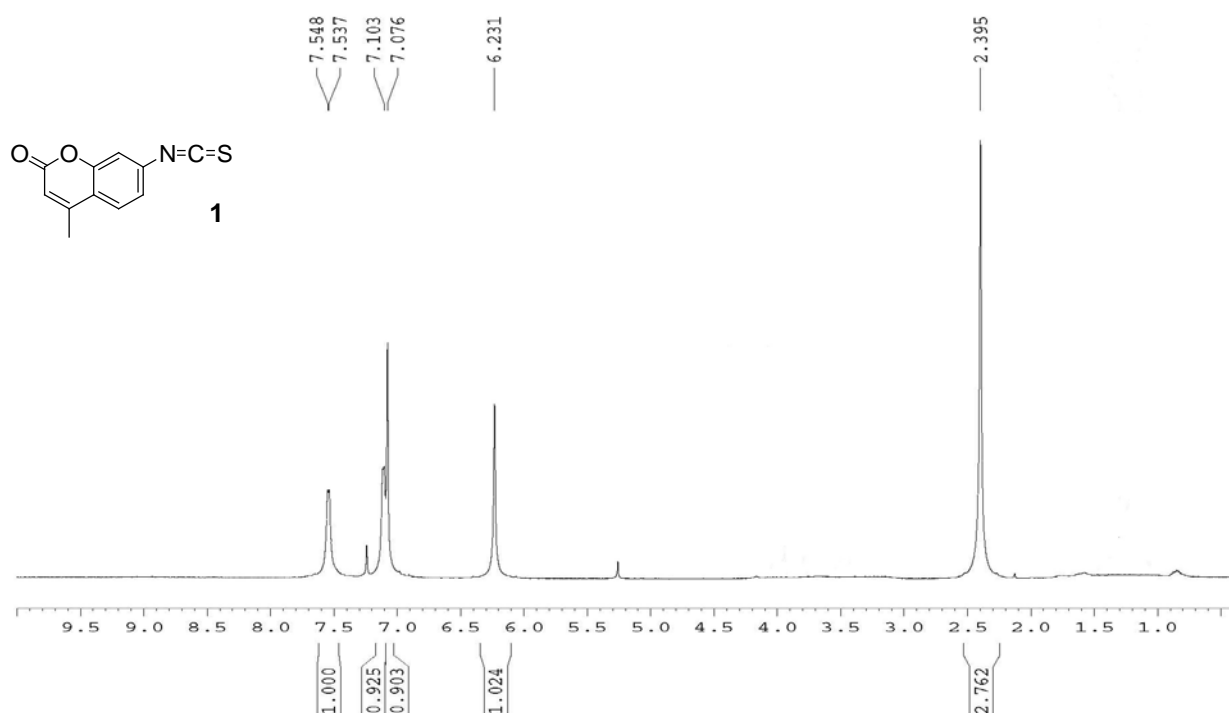

**<sup>13</sup>C NMR spectrum of compound 1 (500 MHz, CDCl<sub>3</sub>)**

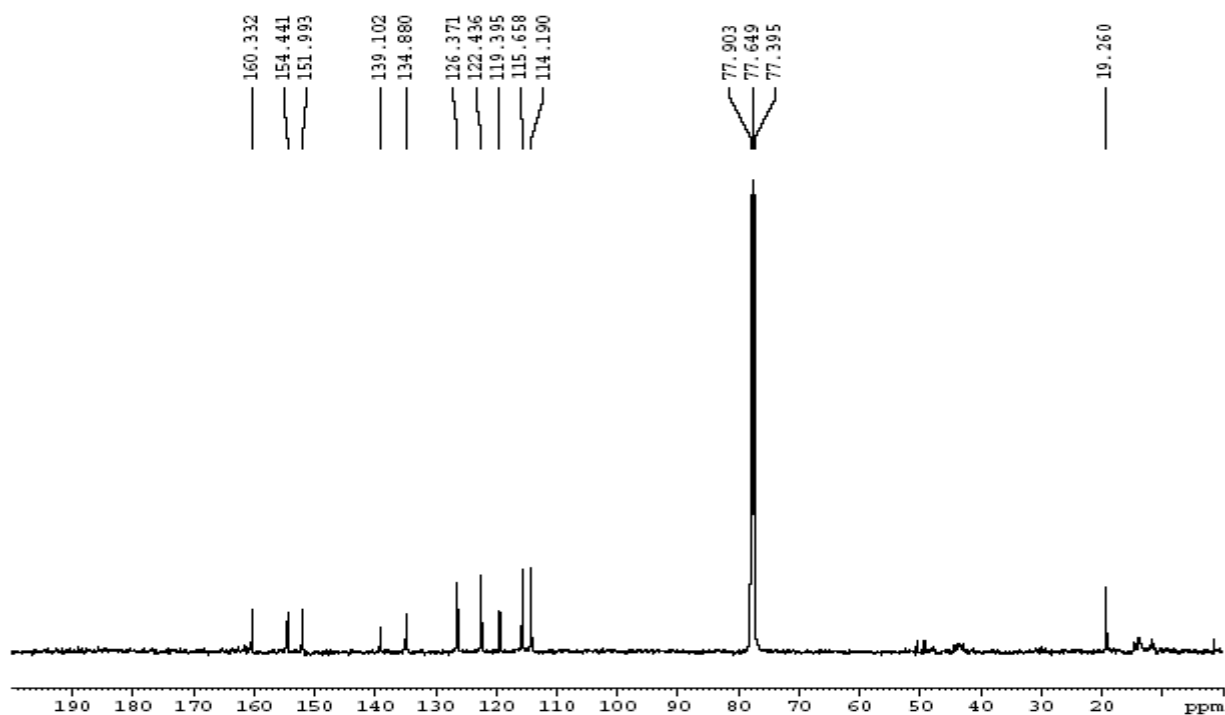

**<sup>1</sup>H NMR spectrum of compound 3 (500 MHz, DMSO-d<sub>6</sub>)**

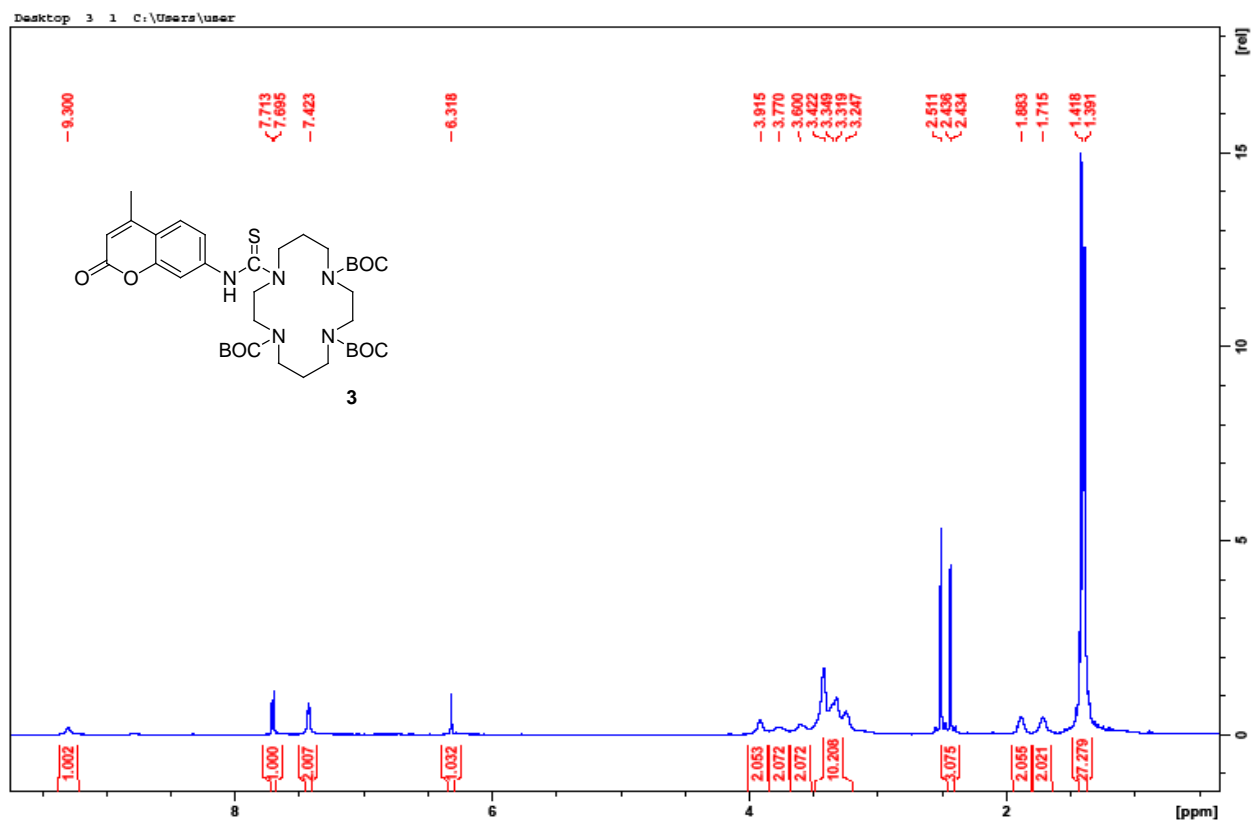

**<sup>13</sup>C NMR spectrum of compound 3 (500 MHz, CDCl<sub>3</sub>)**

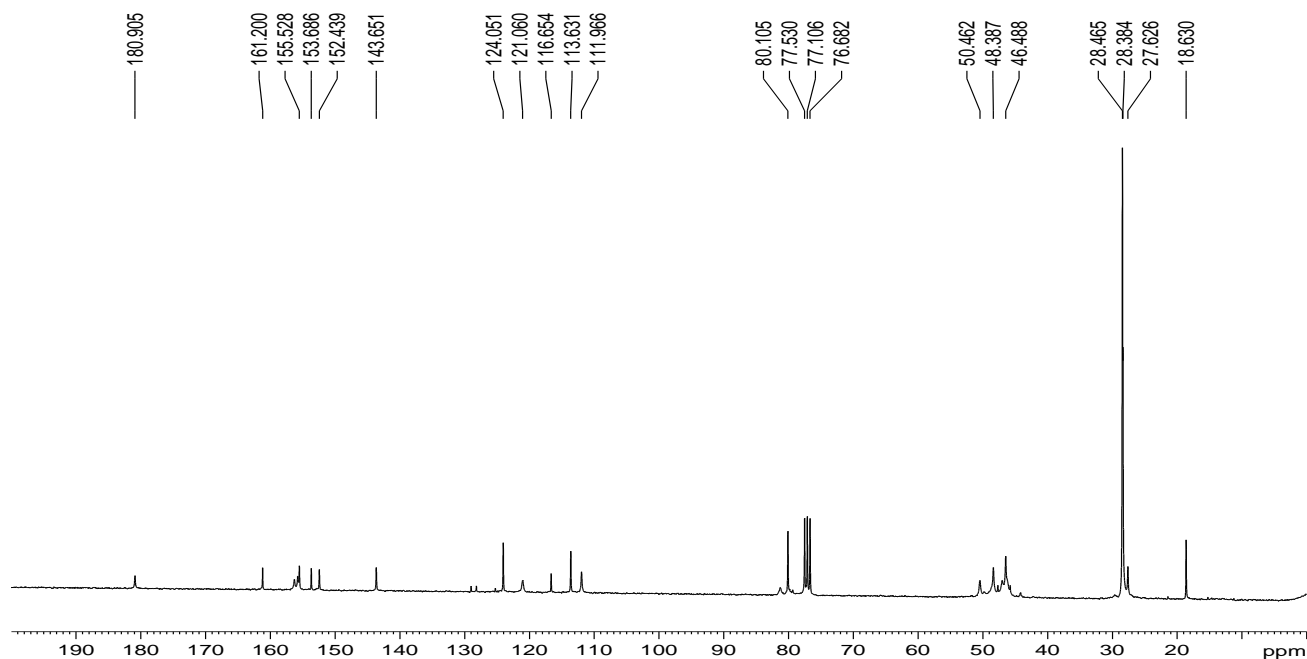

**<sup>1</sup>H NMR spectrum of compound 5 (500 MHz, CDCl<sub>3</sub>)**

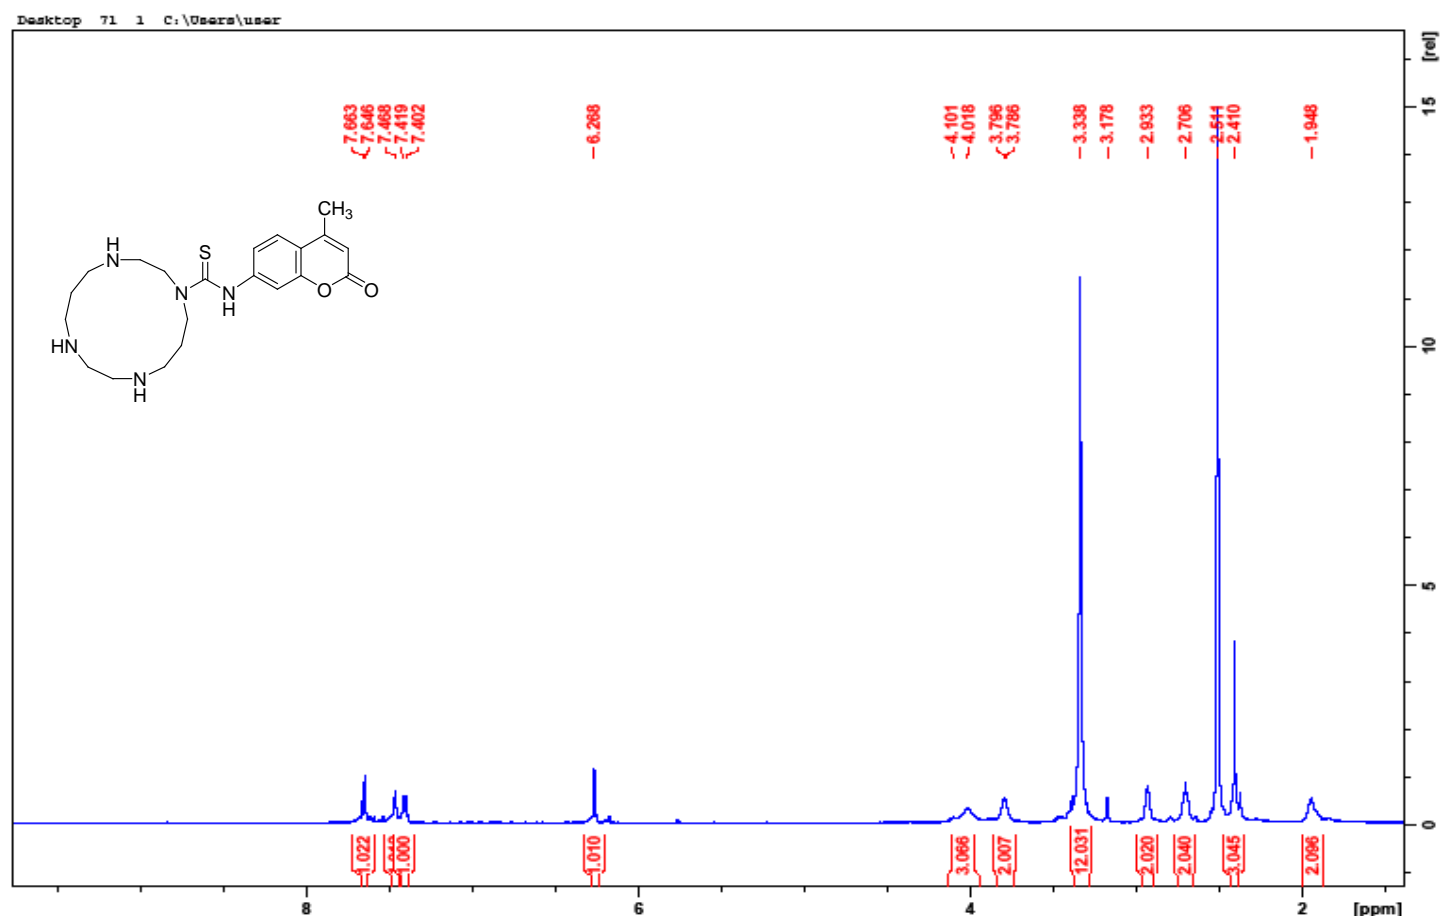

### DART-TOF-Mass spectrum of compound 2

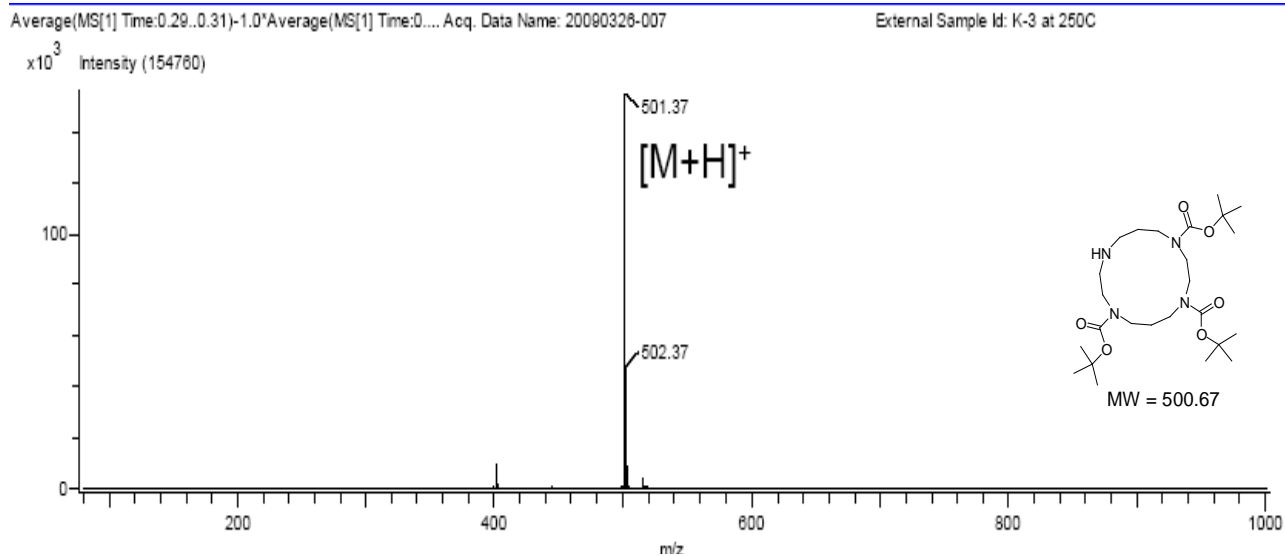

### DART-TOF-Mass spectrum of compound 1

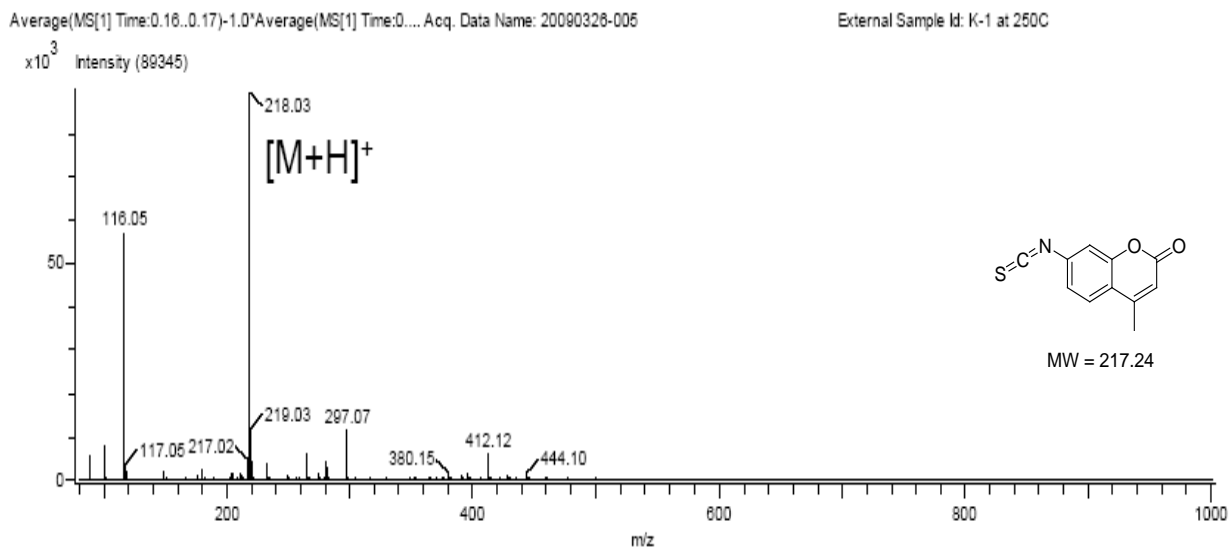

ESI-Mass spectrum of probe 3

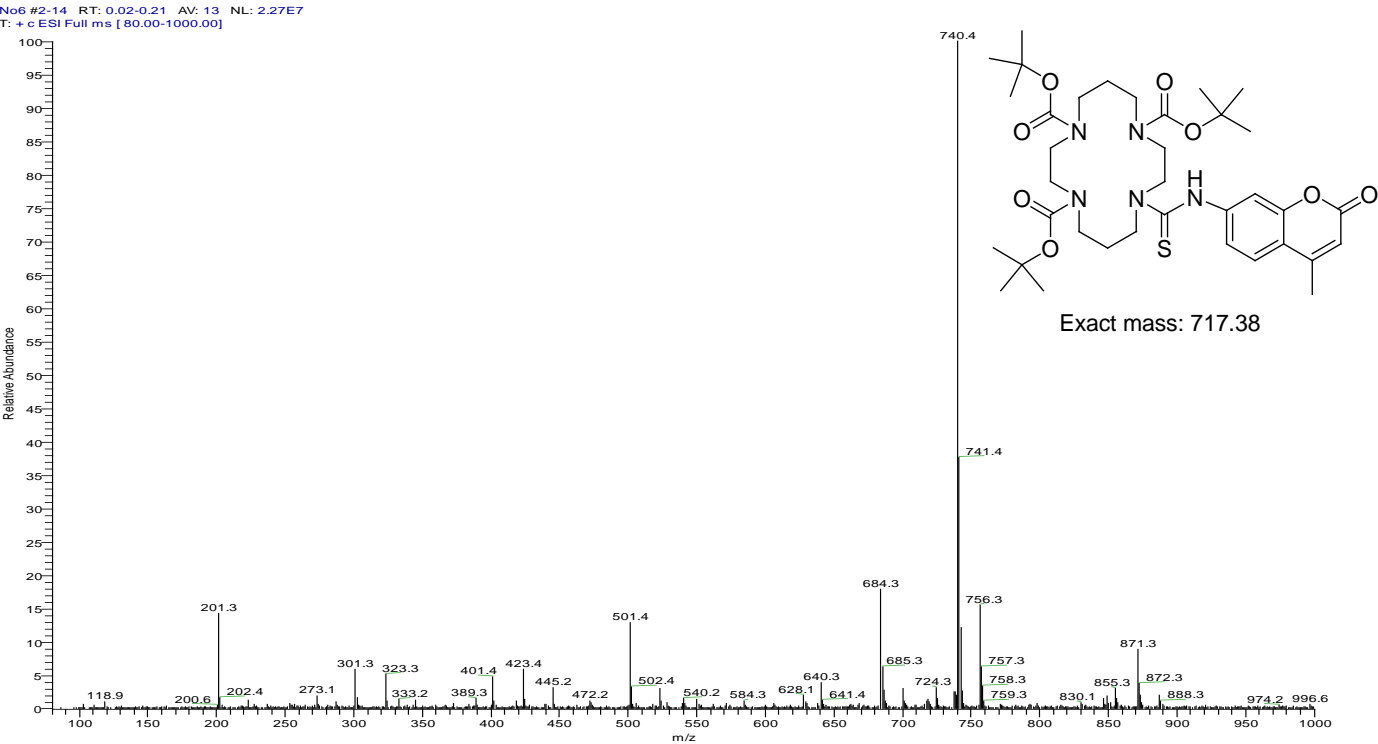

ESI-Mass spectrum of probe 3 and Hg<sup>2+</sup> mixed at equal concentrations  
(negative ionization)

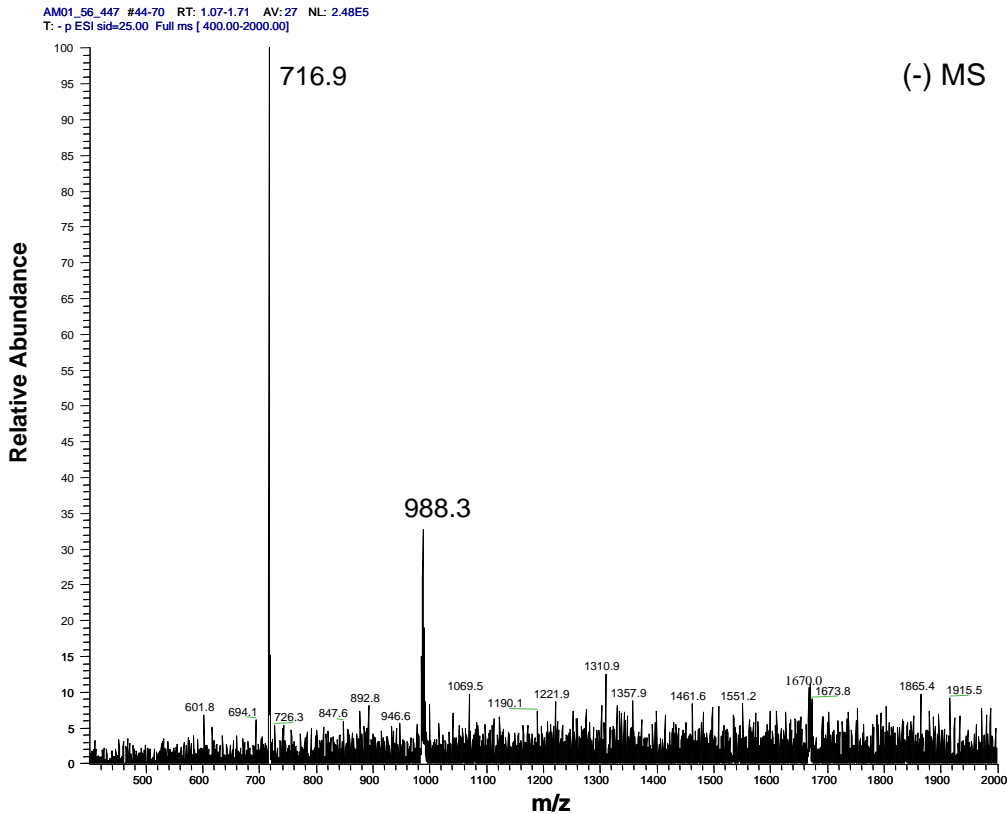

ESI-MS/MS of probe 3-Hg<sup>2+</sup> complex

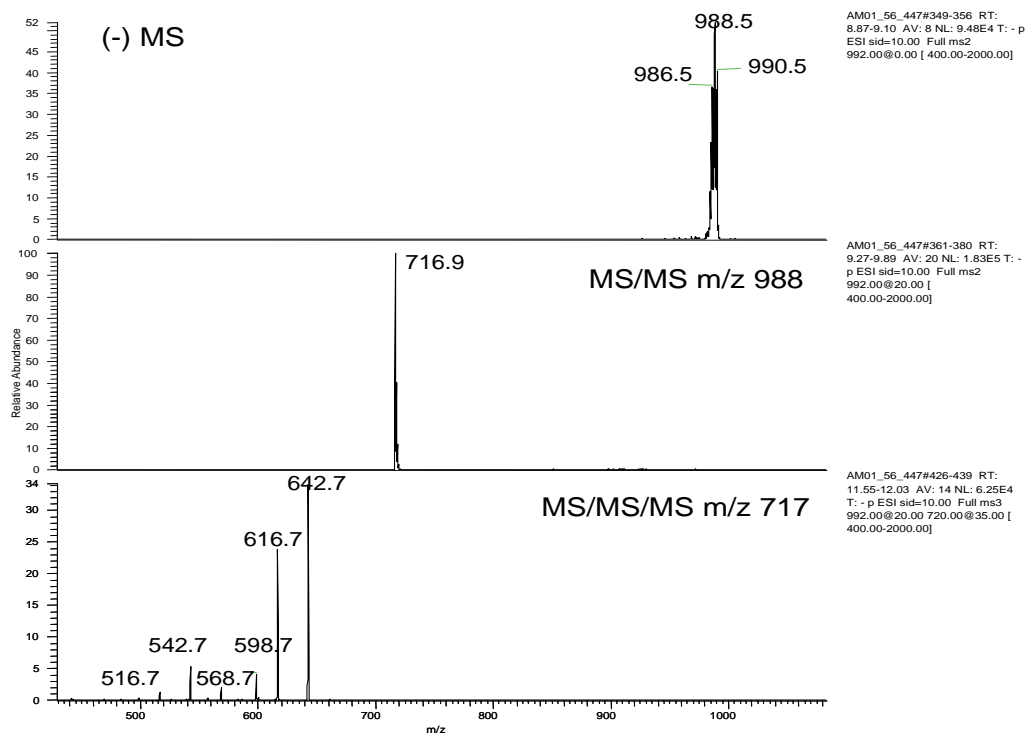

ESI-Mass spectrum of probe 5

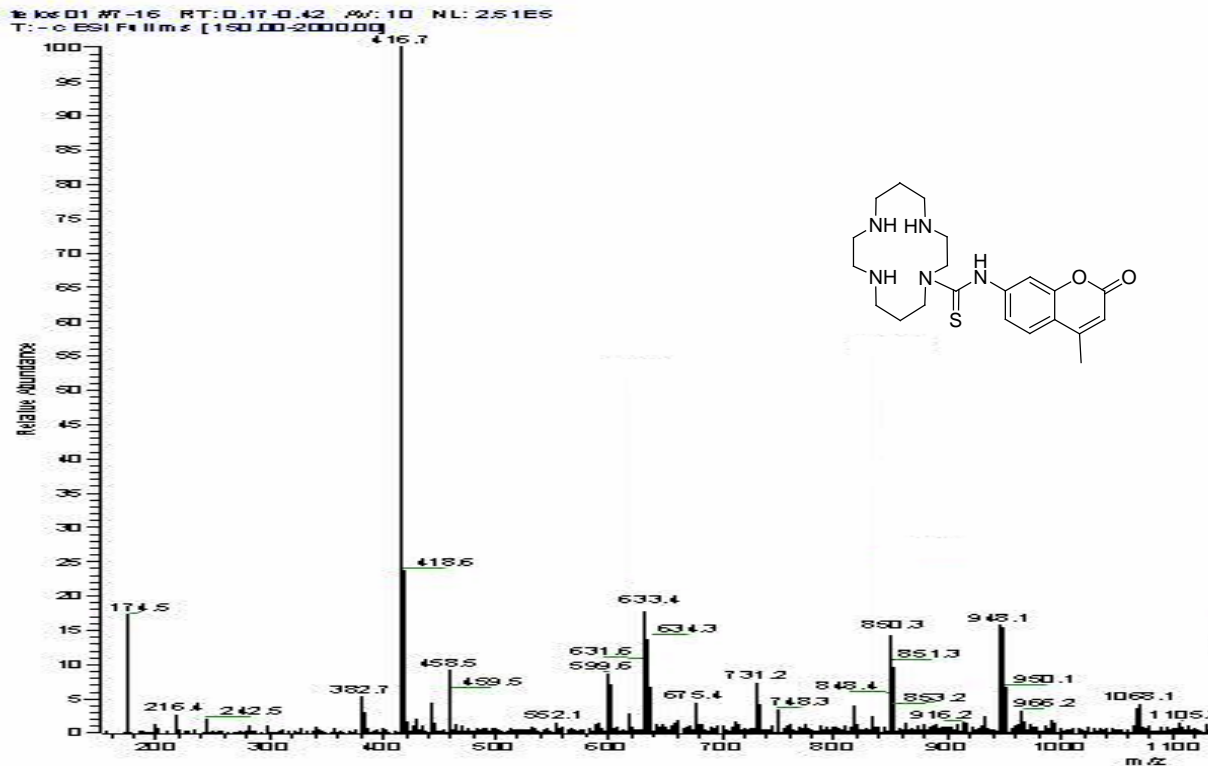

### III) Fluorescence Spectra for 3 in the free and Hg<sup>2+</sup>-bound form

#### Preparation of indicators solutions

A stock indicator solution was prepared in DMSO ( $\geq 99.5\%$ ) at 10 mM concentration. An aliquot of this stock solution was then added to ultra-pure water, to make a final indicator concentration of 10  $\mu\text{M}$ . Hg<sup>2+</sup>-containing solutions were prepared by adding Hg<sup>2+</sup> (0.01 M HgCl<sub>2</sub> solutions prepared in nanopure water) to the final indicator solution, to give Hg<sup>2+</sup> concentrations ranging from 10  $\mu\text{M}$  to 120  $\mu\text{M}$ . The compounds are insensitive to lower concentrations and addition of higher concentrations than the maximum one resulted in quenching of fluorescence.

Ion competition study was performed by adding an aliquot of the stock indicator solution in nanopure water to make a final indicator concentration of 10  $\mu\text{M}$ . To this solution metal was added (0.01 M stock metal solutions prepared in nanopure water from the corresponding chlorides) to make a final metal concentration of 120  $\mu\text{M}$  and fluorescence emission was measured.

Quantum yields were calculated as described in reference 14 using 10  $\mu\text{M}$  solutions of dyes and 120  $\mu\text{M}$  Hg<sup>2+</sup> ion concentrations.

#### Ion Competition Study for dye 3

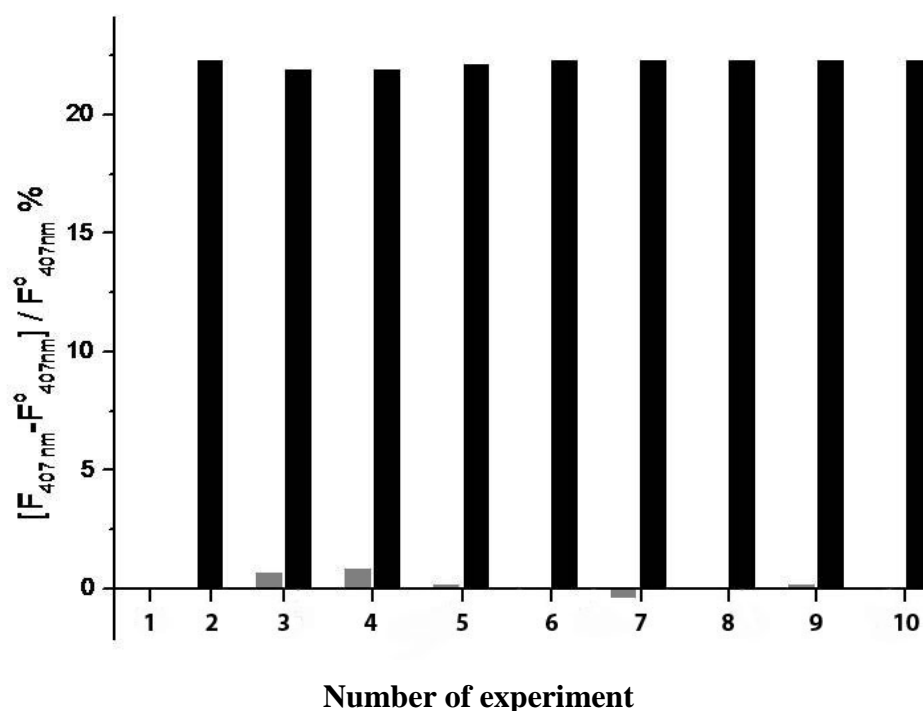

**Fig. S1.** Ion competition study for dye **3**. First measurement: Fluorescence ratio for the free probe (zero). Second measurement: increase of fluorescence ratio  $[F_{(407)} - F_{(407)}^0]/F_{(407)}^0$  in the presence of 120  $\mu\text{M}$   $\text{Hg}^{2+}$  (black bar). Third measurement set: fluorescence ratio in the presence of 120  $\mu\text{M}$   $\text{Zn}^{2+}$  - grey bar (almost zero)- and increase of fluorescence ratio in the presence of both 120  $\mu\text{M}$   $\text{Zn}^{2+}$  and 120  $\mu\text{M}$   $\text{Hg}^{2+}$  - black bar. Likewise, the rest of the measurement sets indicate a fluorescence ratio of the dye in the presence of 120  $\mu\text{M}$  of metal ions (grey bars) vs. ratio after addition of 1 equiv. of  $\text{Hb}^{2+}$  to the sample (black bars). 1:free dye, 2: $\text{Hg}^{2+}$ , 3: $\text{Zn}^{2+}$ , 4: $\text{Cd}^{2+}$ , 5: $\text{Pb}^{2+}$ , 6: $\text{Ca}^{2+}$ , 7: $\text{Ni}^{2+}$ , 8: $\text{Co}^{2+}$ , 9: $\text{Cu}^{2+}$ , 10: $\text{Na}^{2+}$

#### IV) Representative measurements of fluorescence enhancement of probe **5** in the presence of ions.

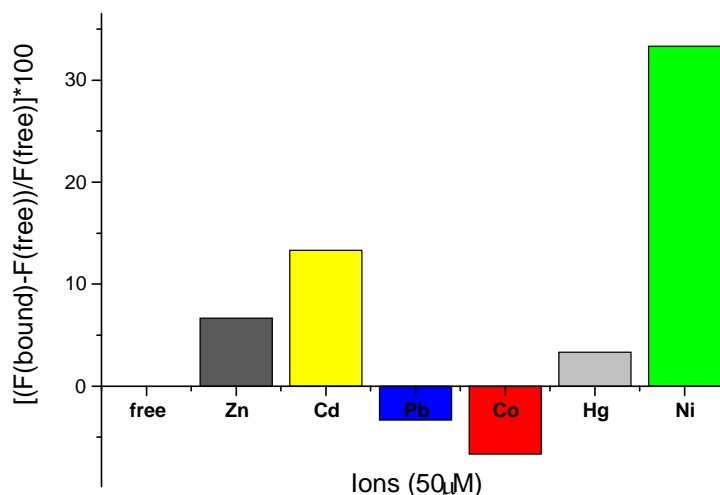

**Fig. S2.** Indicative measurements of fluorescence enhancement, upon binding of probe **5** with a host of ions. Experiments were performed using buffer (10mM HEPES, 140mM NaCl, 2.5 mM KCl, pH= 7.5) and final ion concentration 50  $\mu\text{M}$ . The results verify the total absence of selectivity of **5** for the ions tested.  $\text{Ni}^{2+}$  ions are known to form stable complexes even with multi-cyclam ligands.<sup>2</sup>

### V) DFT geometry optimization for the 5- $\text{Hg}^{2+}$ and 3- $\text{Hg}^{2+}$ complexes

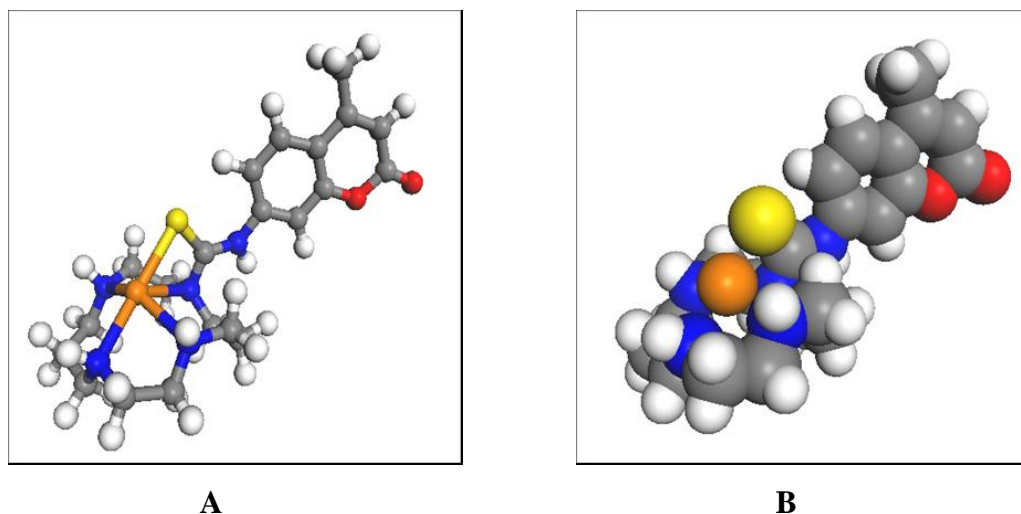

**Fig. S3.** DFT geometry optimization for the **5- $\text{Hg}^{2+}$**  complex (sensor without butyloxycarbonyl-groups). Atoms are represented in colours; mercury: orange, sulphur: yellow, nitrogen: blue, oxygen: red, carbon: grey, hydrogen: white. In Fig. **S3B**, CPK visualization method was used, in which atoms are rendered as spheres with radii related to the van der Waals (VDW) radii. The VDW radii for all atoms can be found in references 3 and 4.<sup>3,4</sup>

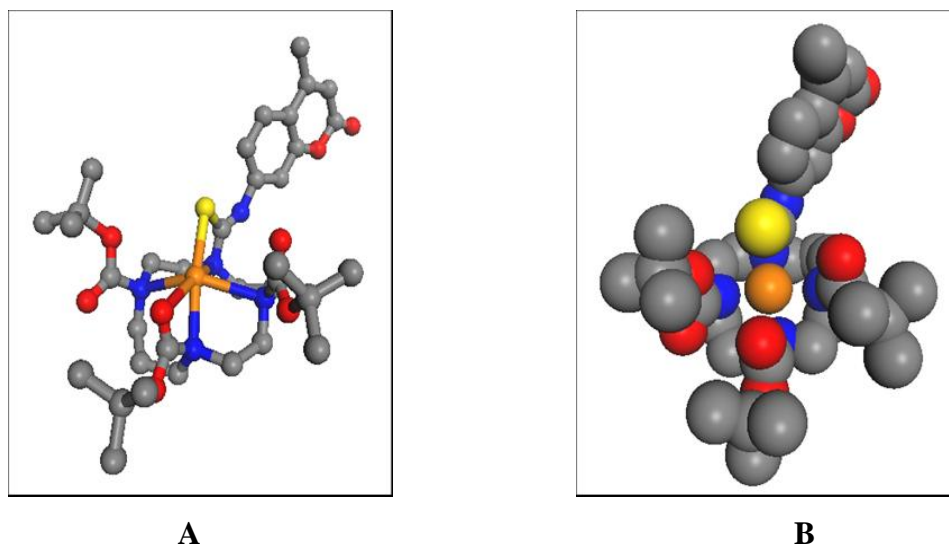

**Fig. S4.** DFT geometry optimization for the **3- $\text{Hg}^{2+}$**  complex (sensor with butyloxycarbonyl-groups). Atoms are represented in colours; mercury: orange, sulphur: yellow, nitrogen: blue, oxygen: red, carbon: grey. Hydrogen atoms are not shown for simplicity. In Fig. **S4B**, CPK visualization method was used, in which atoms are rendered as spheres with radii related to to the van der Waals (VDW) radii. The VDW radii for all atoms can be found in references 3 and 4.

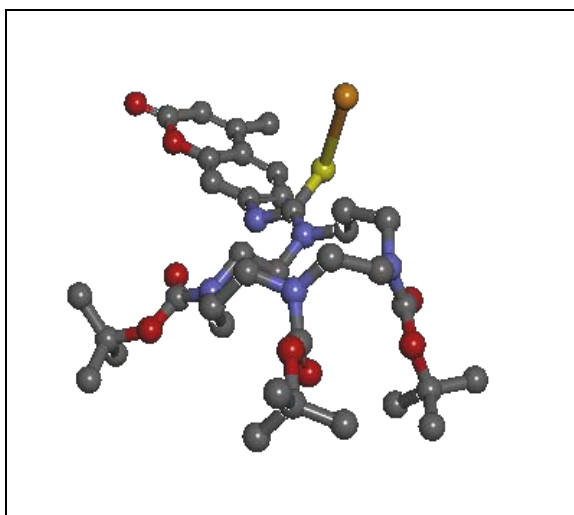

**Fig. S5** DFT geometry optimization for the **3**-Hg<sup>2+</sup> complex. Atoms are represented in colours; mercury: orange, sulphur: yellow, nitrogen: blue, oxygen: red, carbon: grey. Hydrogen atoms are not shown for simplicity. Figure **S5** shows geometry optimizations with all three butyloxycarbonyl-groups “facing away” from the thiourea sulphur atom. In this case coordination with the cyclam nitrogens is lost and the mercury ion is linked only to the sulphur.

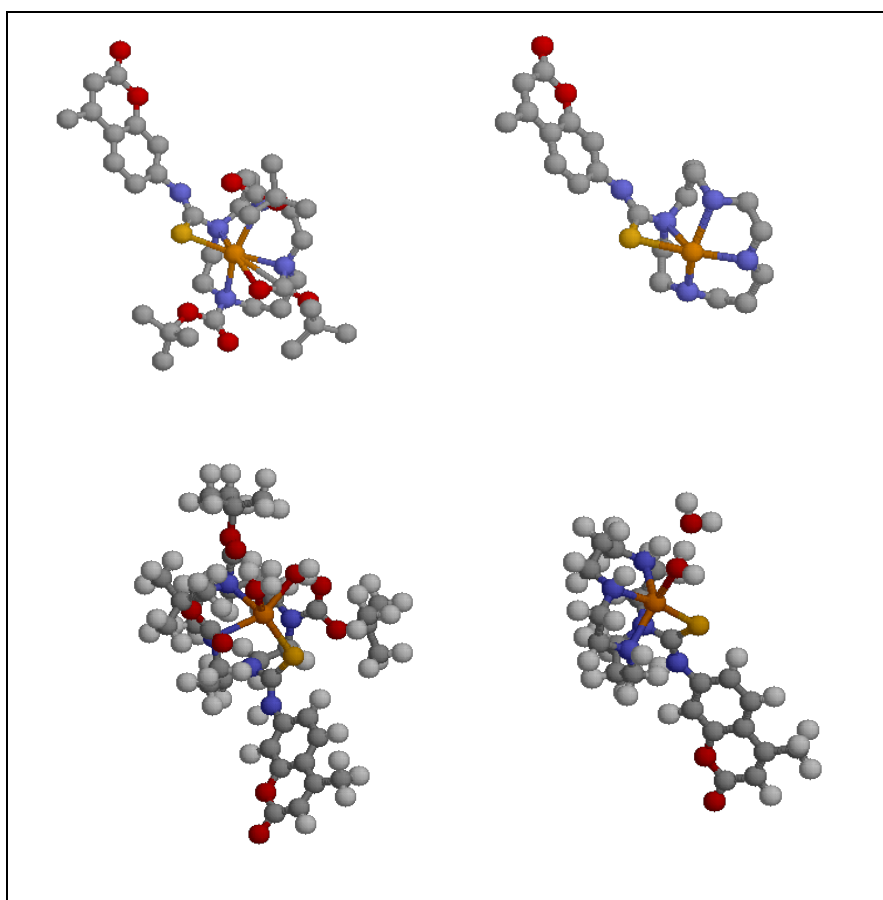

**Fig. S6** COSMO geometry optimizations for the **3**-Hg<sup>2+</sup> (upper left) and **5**-Hg<sup>2+</sup> (upper right) complexes in “aqueous solution”. Hydrogen atoms are not shown for simplicity. No significant changes in the Hg-N bond distances were observed. A second set of DFT calculations on **3**-Hg<sup>2+</sup> and **5**-Hg<sup>2+</sup> were performed in “gas phase” in the presence of two molecules of water. The results indicated that in **5**-Hg<sup>2+</sup> (lower right), one of the water molecules is coordinated with the mercury ion, whereas the second one forms a hydrogen bond with a N-H hydrogen in the cyclam system. No significant differences were observed in Hg-N bond distances. In **3**-Hg<sup>2+</sup> (lower left) both water molecules are coordinated with the mercury ion and Hg-N bond distances increased distinctly for two of the cyclam nitrogens. These results support the hypothesis that in aqueous solution, water may compete with the ligand and as a result weaker ligand coordination would be expected.

Atoms are represented in colours; mercury: orange, sulphur: yellow, nitrogen: blue, oxygen: red, carbon: grey, hydrogen: white.

**Table S1** Bond lengths calculated in DFT geometry optimizations for complexes

| Distances (Å)                 | S-Hg | N1-Hg | N2-Hg | N3-Hg | N4-Hg |
|-------------------------------|------|-------|-------|-------|-------|
| <b>Probe 5</b>                |      |       |       |       |       |
| “Gas phase”                   | 2.58 | 2.40  | 2.47  | 2.70  | 2.47  |
| “Gas phase”-2H <sub>2</sub> O | 2.61 | 2.415 | 2.50  | 2.82  | 2.455 |
| Solvation model-COSMO         | 2.65 | 2.39  | 2.42  | 2.78  | 2.40  |
| <b>Probe 3</b>                |      |       |       |       |       |
| “Gas phase”                   | 2.53 | 2.39  | 2.655 | 2.77  | 2.68  |
| “Gas phase”-2H <sub>2</sub> O | 2.51 | 2.48  | 2.76  | 3.30  | 3.58  |
| Solvation model-COSMO         | 2.50 | 2.33  | 2.71  | 2.735 | 2.70  |

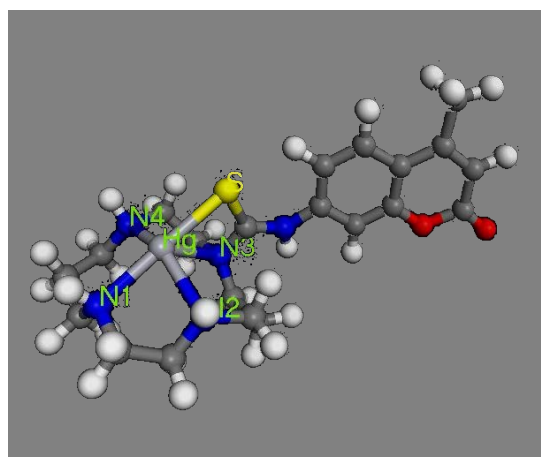

**Table S2** Differences in binding energies of  $\text{Hg}^{2+}$  and  $\text{Zn}^{2+}$  ions with probes **3** and **5**.

| $E_{\text{binding}} \text{ X} - E_{\text{binding}} \text{ Y}$                                 | $\Delta E \text{ ( kcal/mol )}$ |
|-----------------------------------------------------------------------------------------------|---------------------------------|
| $E_{\text{binding}} (\text{Zn}^{2+}\text{-3}) - E_{\text{binding}} (\text{Hg}^{2+}\text{-3})$ | 20,0                            |
| $E_{\text{binding}} (\text{Zn}^{2+}\text{-5}) - E_{\text{binding}} (\text{Hg}^{2+}\text{-5})$ | 31,4                            |
| $E_{\text{binding}} (\text{Hg}^{+2}\text{-5}) - E_{\text{binding}} (\text{Hg}^{+2}\text{-3})$ | 33,0                            |
| $E_{\text{binding}} (\text{Zn}^{2+}\text{-5}) - E_{\text{binding}} (\text{Zn}^{2+}\text{-3})$ | 44,8                            |

## VII) Detection limit of probe 3 for $\text{Hg}^{2+}$ ions.

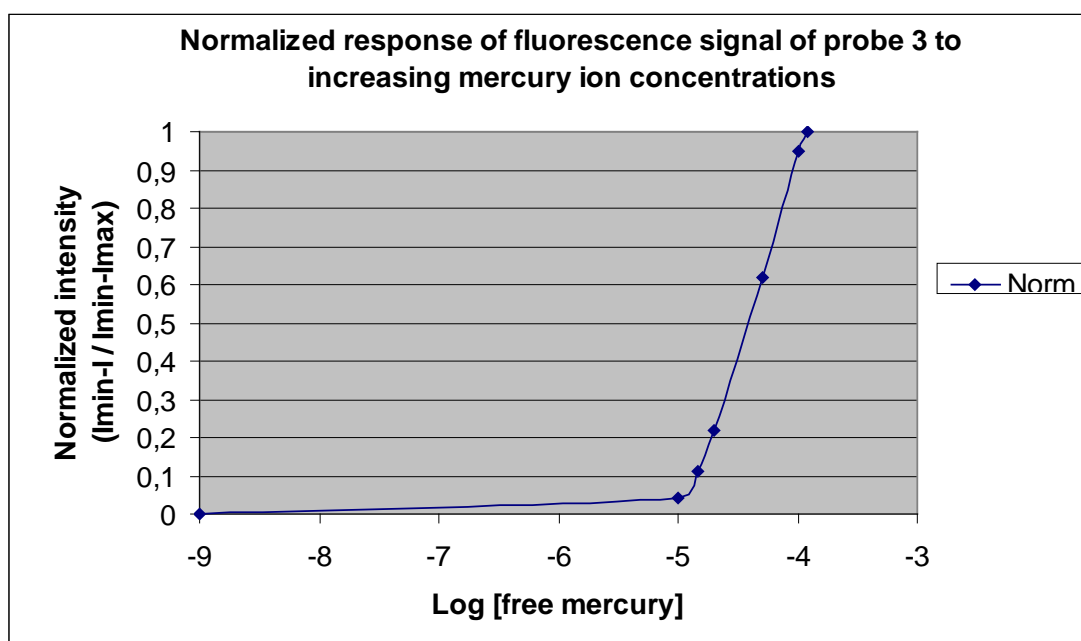

**Fig. S6.** Fluorescence intensity of the sensor at each concentration of mercury ion, normalized between the minimum fluorescence intensity, found at zero free mercury (shown on the graph as 1,0 nM), and the maximum fluorescence intensity, found at 120,0  $\mu\text{M}$ . A linear regression curve was fitted to the five intermediate values (10,0  $\mu\text{M}$  -100,0  $\mu\text{M}$ ) of **Fig. S6**. The point at which this line crossed the ordinate axis was taken as the detection limit and equalled approximately 21  $\mu\text{M}$ .<sup>5</sup>

## LITERATURE

- <sup>1</sup> G. G. Morlock, and Y. Ueda, *J. Chromatogr. A*, , 2007, **1143**, 243-251.
- <sup>2</sup> Y. Dong , L. F. Lindoy , P. Turner and G. Wei *Dalton Trans.*, 2004, 1264-1270
- <sup>3</sup> A.Bondi, *J. Phys. Chem.* 1964, **68**, 441-451.
- <sup>4</sup> M. Mantina, A. C. Chamberlin, R. Valero, C. J. Cramer, and D. G. Truhlar, *J. Phys. Chem. A*, 2009, **113**, 5806-5812
- <sup>5</sup> M. Shortreed, R. Kopelman, M. Kuhn, B. Hoyland, *Anal. Chem.* 1996, **68**, 1414.
